# Supplementary material for: Beneficial Effects of Melatonin in the Ovarian Transport Medium on In Vitro Embryo Production of Iberian Red Deer (Cervus elaphus hispanicus)
Source: Animals (Basel). 2020 Apr 27;10(5):763. doi: 10.3390/ani10050763 (PMC7278470; doi:10.3390/ani10050763)
Supplement: Supplementary file 1 [file animals-10-00763-s001.pdf]

## Supplementary materials

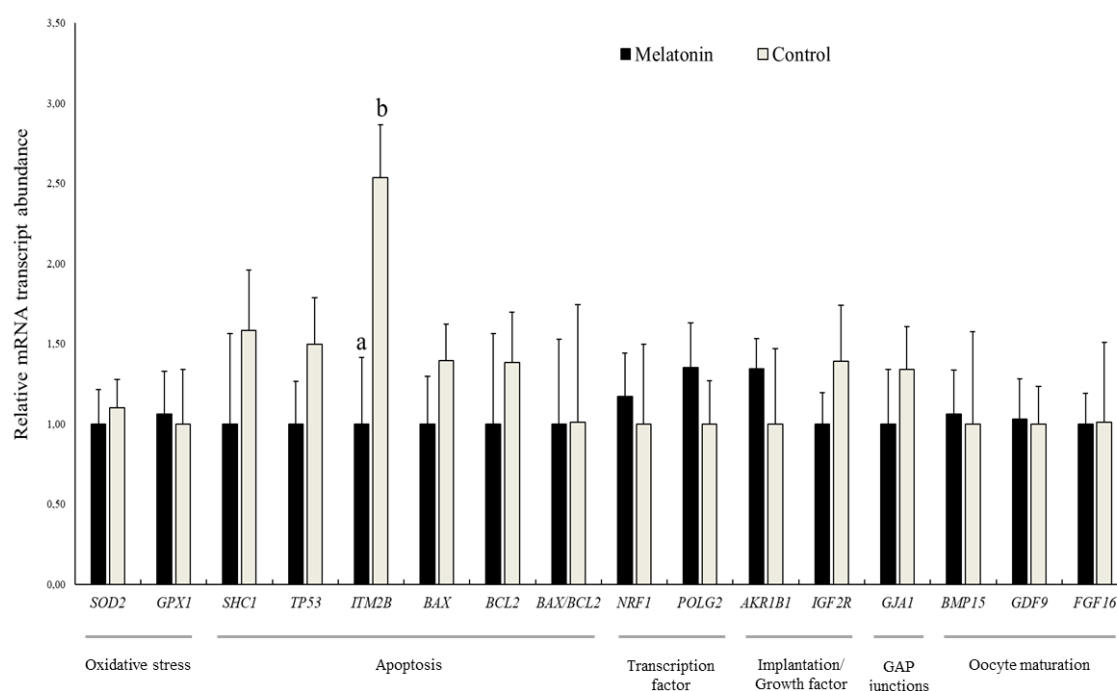

**Figure S1.** Relative mRNA transcript abundance in sheep oocytes collected from ovary stored with (Melatonin) and without melatonin (Control); Results are expressed as mean  $\pm$  SEM; <sup>a,b</sup> Different letters indicate differences ( $p \leq 0.05$ ) among treatments.

**Table S1.** *In vitro* maturation of sheep oocytes retrieved from ovaries stored with and without melatonin.

| Nuclear configuration after IVM |                        |                  |                 |                  |
|---------------------------------|------------------------|------------------|-----------------|------------------|
| Treatment                       | N <sup>o</sup> oocytes | GV (%)           | GVBD/MI (%)     | MII (%)          |
| Melatonin                       | 92                     | 11.41 $\pm$ 6.39 | 4.19 $\pm$ 3.54 | 84.39 $\pm$ 6.69 |
| Control                         | 90                     | 8.68 $\pm$ 6.39  | 3.12 $\pm$ 3.54 | 88.19 $\pm$ 6.69 |

Data expressed as mean  $\pm$  SEM; Results represent three replicates.

**Table S2.** Effect of melatonin supplementation during ovary transport on rates of cleavage and blastocyst development in sheep.

| Treatment | n   | Cleaved embryo at 48 hpi (%) | Expanded blastocyst (%) |                               |
|-----------|-----|------------------------------|-------------------------|-------------------------------|
|           |     |                              | Total                   | Cleaved                       |
| Melatonin | 195 | 57.66 $\pm$ 4.33             | 26.76 $\pm$ 2.35        | 46.86 $\pm$ 4.26 <sup>a</sup> |
| Control   | 195 | 67.97 $\pm$ 4.51             | 23.13 $\pm$ 2.26        | 30.34 $\pm$ 4.10 <sup>b</sup> |

Data expressed as mean  $\pm$  SEM; Results represent five replicates; <sup>a,b</sup> Different letters indicate differences ( $P \leq 0.05$ ) among treatments

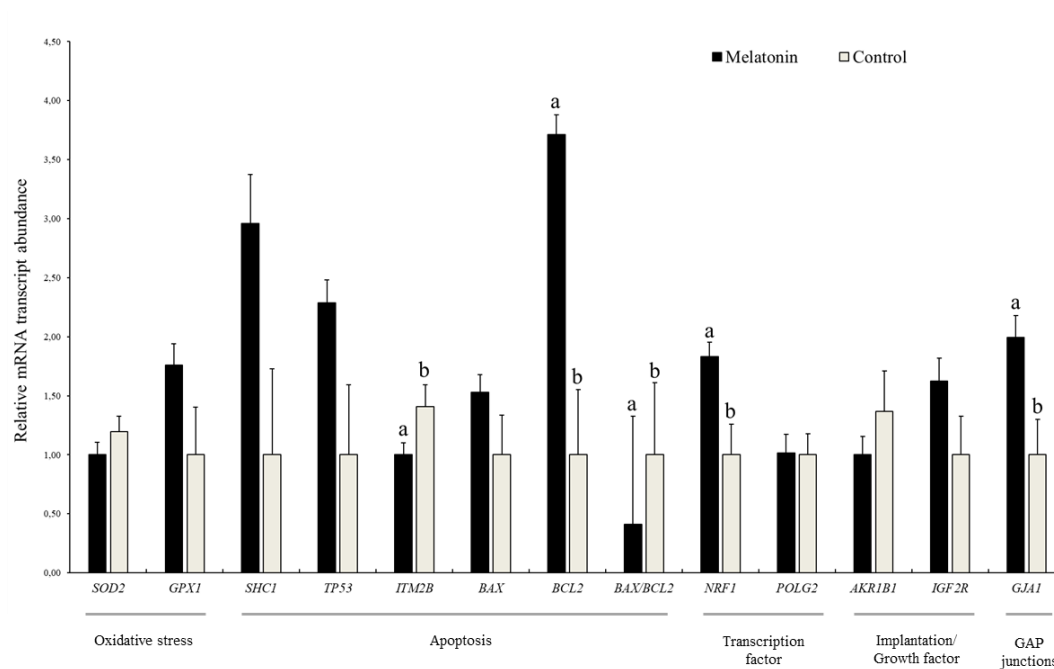

**Figure S2.** Relative mRNA transcript abundance in sheep blastocysts produced *in vitro* from ovary stored with (Melatonin) and without melatonin (Control); Results are expressed as mean  $\pm$  SEM; <sup>a,b</sup> Different letters indicate differences ( $p \leq 0.05$ ) among treatments
